# Supplementary material for: Biomarkers Predictive for In-Hospital Mortality in Patients with Diabetes Mellitus and Prediabetes Hospitalized for COVID-19 in Austria: An Analysis of COVID-19 in Diabetes Registry
Source: MDPI journal article supplement (doi:10.3390/v14061285), 2022-06-13
Supplement: s1 [file s1]

### **Members of the “COVID-19 in Diabetes in Austria Study Group**

Harald Sourij, Norbert J. Tripolt, Caren Sourij, Farah Abbas, Oliver Malle, Julia Mader  
Medical University of Graz, Austria

Peter Fasching, Gersina Rega-Kaun, Kadriye Aydinkov-Tuzcu, Alexander Bräuer, Brigitte Bernhardt  
Medical Division for Endocrinology, Rheumatology, and Acute Geriatrics, Wilhelminen Hospital Vienna, Austria

Christian Ciardi, Marc Schaber, Anna Schapfl, David Fiegl  
Clinical Division for Internal Medicine, Endocrinology, Diabetology, and Metabolic Diseases  
St. Vinzenz Hospital Zams, Austria

Martin Clodi, Carmen Klammer, Michael Resl, Matthias Heinzl, Roland Feldbauer, Johannes Pohlhammer  
Clinical Division for Internal Medicine, Konventhospital Barmherzige Brüder Linz, Austria

Mario Karolyi, Erich Pawelka  
4<sup>th</sup> Medical Division with Infectiology, SMZ Süd-KFJ-Hospital, Vienna, Austria

Alexandra Kautzky-Willer, Peter Wolf  
Clinical Division for Endocrinology and Diabetology and Metabolic Diseases, AKH Vienna, Austria

Lars Stechemesser, Michael Schranz  
Department for Internal Medicine I, Paracelsus Medical University, Salzburg, Austria

Harald Stingl, Michael Wagner, Reinhard Würfel  
Clinical Division for Internal Medicine, Hospital Melk, Austria

Thomas M. Stulnig, Slobodan Peric, Andreas Zitterl  
3<sup>rd</sup> Medical Department and Karl Landsteiner Institute for Metabolic Diseases and Nephrology, Clinic Hietzing, Vienna Health Care Group, Austria

Susanne Kaser, Claudia Ress  
Department for Internal Medicine I, Medical University Innsbruck, Austria
